# Supplementary material for: Severely Damaged Freeze-Injured Skeletal Muscle Reveals Functional Impairment, Inadequate Repair, and Opportunity for Human Stem Cell Application
Source: MDPI journal article supplement (doi:10.3390/biomedicines12010030), 2023-12-21
Supplement: s1 [file s1]

## Supplementary Information

| Human Target gene | Primer sequence                                                | Annealing temperature (C°) |
|-------------------|----------------------------------------------------------------|----------------------------|
| IDO               | F 5'-TGCTAAAGGCGCTGTTGGAA-3'<br>R 5'-TACACCAGACCGTCTGATAG-3'   | 60                         |
| HGF               | F 5'-CAATAGCATGTCAAGTGGAG-3'<br>R 5'-CTGTGTTTCGTGTGGTATCAT -3' | 60                         |
| GAPDH             | F 5'-CATCATCTCTGCCCCCTCT-3'<br>R 5'-CAAAGTTGTCATGGATGACCT-3'   | 60                         |
| COX-2             | QHsaCED0042341 BioRad                                          | 60                         |
| Mouse Target gene | Primer sequence                                                | Annealing temperature (C°) |
| eMHC              | F GCCTTGCTTTCCCAGAG<br>R CGTACACGGACTTGGAGAG                   | 60                         |
| Pax7              | F TGTGCCGATATCAGGAGACT<br>R GTCCTTCAGCAGCCGGTC                 | 60                         |
| Myod              | F CGCTCCAACTGCTCTGATG<br>R GCGCCGCCTCACTGTAGT                  | 60                         |
| Myog              | F-CCATCCAGTACATCGAGCG<br>R-TGGACTGCAGGAGGCGCT                  | 60                         |
| Il-6              | F ACCGCTATGAAGTTCCTCTC<br>R AGTAGGGAAGGCCGTGGTT                | 60                         |
| Tnf- $\alpha$     | F AACTTCGGGGTGATCGGTC<br>R AGGGTCTGGGCCATAGAAC                 | 60                         |
| Ccl2              | F CTGCTGCTACTCATTACCA<br>R CCTTCTTGGGGTCAGCACA                 | 60                         |
| Il-10             | F AGTTTTACCTGGTAGAAGTGAT<br>R ATCACTCTTCACCTGCTCCA             | 60                         |
| Arg1              | F GAAGAATGGAAGAGTCAGTGT<br>R CCATGCAGATTCCCAGAGC               | 60                         |
| CD206             | F ATGAGGCTTCTCCTGCTTCT<br>R TTGCCGTCTGAACTGAGATG               | 60                         |
| Gapdh             | F CACCACCAACTGCTTAGCC<br>R GGATGCAGGGATGATGTTCT                | 60                         |

**Table S1.** Primers used for the detection of genes involved in muscle regeneration and inflammation process.

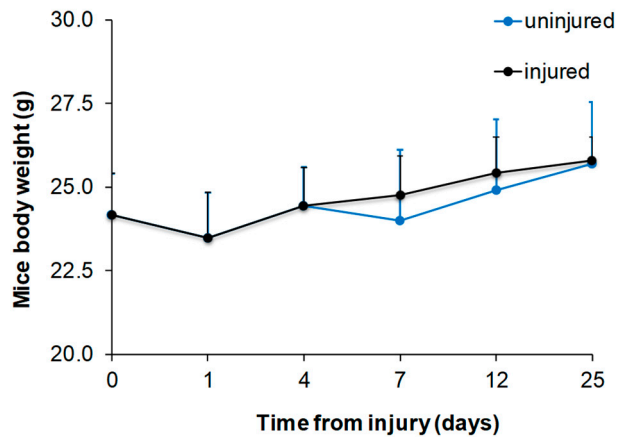

**Figure S1** The injured mice did not demonstrate altered body weight compared to the uninjured mice at the experimental time points.

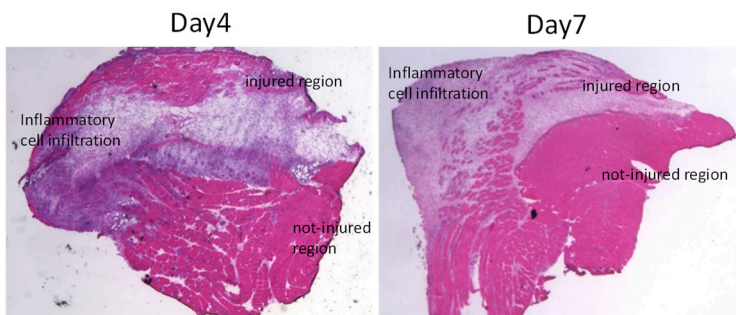

**Figure S2** Qualitative histological observation of the entire frozen *biceps femoris* muscle showed the degree of injury and the substantial inflammatory infiltration. Representative images of hematoxylin and eosin-stained cross sections (10x).

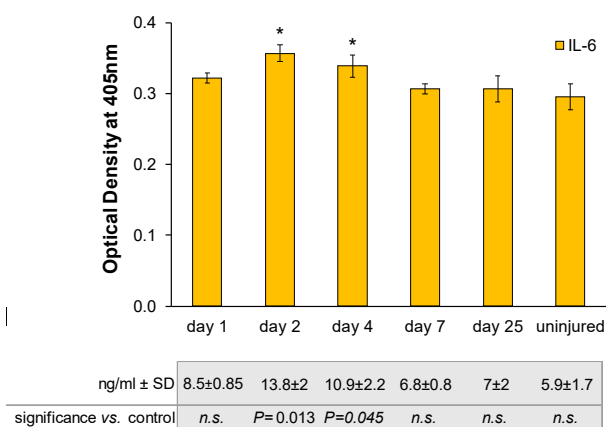

**Figure S3** FI generated systemic inflammatory IL-6 response. Proinflammatory cytokine IL-6 expression levels were investigated in uninjured control and injured mice after *biceps femoris* muscle damage. Detectable levels of IL-6 are shown in the table. Statistical significance was evaluated by one-way ANOVA by running a post hoc test. \*  $p < 0.05$  (one vs. uninjured).

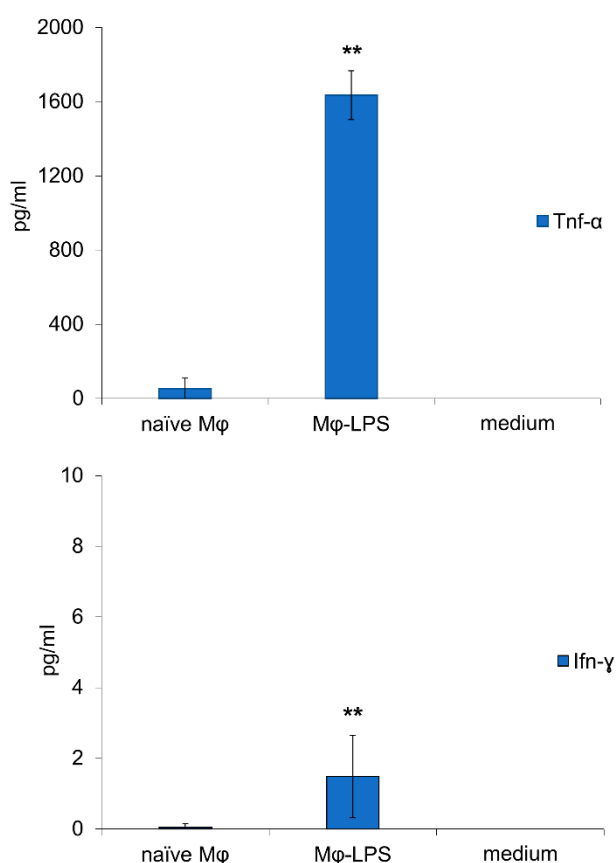

**Figure S4** LPS treatment induced M0 RAW264.7 murine macrophages towards M1 phenotype transition. TNF- $\alpha$  and IFN- $\gamma$  production was quantified in the supernatant of cultured naïve Raw 264-7 cells (naïve Mφ) and LPS-treated Raw 264-7 cells (Mφ-LPS) by ELISA assay. All data were expressed as mean  $\pm$  SD ( $n = 4$ ). Statistical significance was evaluated by Student's  $t$ -test. \*\*  $p < 0.001$  vs. naïve Mφ

## Supplementary Material and Methods

### Serum Cytokines assay

Diluted sera 1:50 from uninjured control mice and injured mice, collected at 1, 2, 4, 7, and 25 days postinjury, were used for the detection of interleukin-6 (IL-6; mouse ELISA development kits; PeproTech® EC Ltd, UK) according to the manufacturer's instructions. Mouse sera and mouse recombinant standards were diluted in  $1 \times$  PBS/0.05% Tween-20/0.1% BSA (Sigma-Aldrich®, Dorset, UK) and added to the microplates. Interleukin binding was detected in the biotin-avidin detection step, followed by chromogen 2,2'-azino-bis(3-ethylbenzothiazoline- 6-sulphonic acid) (Sigma-Aldrich®, Dorset, UK) incubation. Color development was monitored at 405 nm. The concentration of cytokines in the samples was determined from the standard curve, where detectable.

### Supernatant Cytokines assay

Diluted supernatants 1:2 from cultured naïve Raw 264-7 cells (naïve Mφ) and LPS-treated Raw 264-7 cells (Mφ-LPS) were used for the detection of interferon  $\gamma$  (IFN- $\gamma$ ; Mouse IFN- $\gamma$  ELISApr kit, MABTECH, AB Sweden) and tumor necrosis factor  $\alpha$  (TNF- $\alpha$  mouse ELISA development kits; PeproTech® EC Ltd, UK) according to the manufacturer's

instructions. Color development was monitored at 450 nm (IFN- $\gamma$ ) and 405 nm (TNF- $\alpha$ ). The concentration of cytokines in the samples was determined from the standard curve, where detectable.
